# Supplementary material for: Machine-learned analysis of global and glial/opioid intersection–related DNA methylation in patients with persistent pain after breast cancer surgery
Source: Clin Epigenetics. 2019 Nov 27;11:167. doi: 10.1186/s13148-019-0772-4 (PMC6881976; doi:10.1186/s13148-019-0772-4)
Supplement: Supplementary file 1 — Additional file 1. Supplemental information includes a table of results of a PC-corr analysis of the data in Microsoft Excel format (PCcorr_results.xlsx). [file 13148_2019_772_MOESM1_ESM.xlsx]

## Sheet: PCA results
P-value	AUC	AUPR	Norm	Centering	Dim	expl Var
0.0807704	0.585612	0.543402	QUANTILE T	no	1	99.8265
4.00586e-05	0.701224	0.599362	PLUS(ABS(MIN))	no	1	99.6546
4.00586e-05	0.701224	0.599362	-	no	1	99.6546
0.066385	0.59	0.584527	DRS	no	1	99.6461
0.0950951	0.581837	0.597006	ZSCORE T	no	1	99.6352
0.00109351	0.66	0.617301	QUANTILE	no	1	99.3616
0.000103561	0.690204	0.635284	SQRT	no	1	98.659
0.00723132	0.631633	0.601772	LOG	no	1	97.6477
0.0168437	0.617143	0.605046	DCS	no	1	92.6786
0.0168437	0.617143	0.605046	MANORM	no	1	92.6786
0.0434677	0.59898	0.591993	DRS	yes	1	64.3103
0.0194952	0.61449	0.59901	MANORM	yes	1	57.5173
0.0194952	0.61449	0.59901	DCS	yes	1	57.5173
0.0101902	0.625918	0.604411	LOG	yes	1	55.2527
0.0112137	0.624286	0.60405	SQRT	yes	1	54.8849
0.0676276	0.589592	0.586725	QUANTILE	yes	1	41.855
0.0554926	0.593878	0.592853	ZSCORE	no	1	40.5158
0.0554926	0.593878	0.592853	ZSCORE	yes	1	40.5158
0.0307042	0.605918	0.595919	PARETO SCALING	no	1	35.7633
0.0307042	0.605918	0.595919	PARETO SCALING	yes	1	35.7633
0.0366145	0.602449	0.587869	PLUS(ABS(MIN))	yes	1	33.9396
0.0366145	0.602449	0.587869	-	yes	1	33.9396
3.91989e-06	0.726122	0.677406	ZSCORE T	yes	1	25.9421
4.37509e-06	0.725	0.674162	QUANTILE T	yes	1	25.637
9.50913e-06	0.716939	0.610858	PLUS(ABS(MIN))	yes	2	24.5018
9.50913e-06	0.716939	0.610858	-	yes	2	24.5018
3.26992e-06	0.727959	0.616652	PARETO SCALING	yes	2	21.0886
3.26992e-06	0.727959	0.616652	PARETO SCALING	no	2	21.0886
0.0347831	0.603469	0.567804	ZSCORE T	yes	2	18.615
0.220469	0.560102	0.522788	QUANTILE T	yes	2	18.5056
1.14087e-06	0.738367	0.619955	ZSCORE	no	2	16.3539
1.14087e-06	0.738367	0.619955	ZSCORE	yes	2	16.3539
4.88325e-06	0.723878	0.609639	QUANTILE	yes	2	16.1682
0.0711404	0.588469	0.570242	QUANTILE T	yes	3	16.0838
0.00670796	0.632857	0.58729	DCS	yes	2	15.7363
0.00670796	0.632857	0.58729	MANORM	yes	2	15.7363
0.000677183	0.666531	0.669443	ZSCORE T	yes	3	14.508
0.718477	0.517755	0.508837	LOG	yes	2	13.5992
0.712254	0.518163	0.516393	SQRT	yes	2	11.8629
0.0727909	0.587959	0.555615	ZSCORE	no	3	11.5373
0.0727909	0.587959	0.555615	ZSCORE	yes	3	11.5373
0.000114746	0.68898	0.688483	PLUS(ABS(MIN))	yes	3	11.2321
0.000114746	0.68898	0.688483	-	yes	3	11.2321
0.264925	0.554694	0.532326	QUANTILE	yes	3	10.7063
0.679904	0.520306	0.535843	QUANTILE T	yes	4	10.2519
0.000730638	0.66551	0.658838	LOG	yes	3	9.88206
0.174926	0.566531	0.55215	ZSCORE T	yes	4	9.76709
0.00197197	0.651633	0.645946	SQRT	yes	3	9.69381
0.000482405	0.67102	0.633437	PARETO SCALING	yes	3	9.61174
0.000482405	0.67102	0.633437	PARETO SCALING	no	3	9.61174
0.000135956	0.686939	0.694013	DRS	yes	2	9.30672
0.22762	0.559184	0.547691	DCS	yes	3	8.36486
0.22762	0.559184	0.547691	MANORM	yes	3	8.36486
0.538742	0.530204	0.55631	LOG	yes	4	7.88863
0.263143	0.554898	0.497576	ZSCORE T	yes	5	7.79567
0.23906	0.557755	0.57654	SQRT	yes	4	7.54319
0.000608432	0.667959	0.654468	PLUS(ABS(MIN))	yes	4	7.33596
0.000608432	0.667959	0.654468	-	yes	4	7.33596
0.19637	0.563367	0.55122	QUANTILE T	yes	5	7.02037
0.525067	0.531224	0.54794	ZSCORE T	yes	6	6.98166
0.00166409	0.654082	0.645679	PARETO SCALING	no	4	6.84367
0.00166409	0.654082	0.645679	PARETO SCALING	yes	4	6.84367
0.0818659	0.585306	0.555781	PARETO SCALING	yes	5	6.3017
0.0818659	0.585306	0.555781	PARETO SCALING	no	5	6.3017
0.595166	0.526122	0.531914	ZSCORE T	yes	7	6.19268
0.0274771	0.608061	0.577514	QUANTILE T	yes	6	6.13085
0.000206261	0.681837	0.681823	DRS	yes	3	6.00124
2.07027e-05	0.708571	0.699192	QUANTILE	yes	4	5.95104
1.06745e-05	0.715714	0.712528	ZSCORE	yes	4	5.898
1.06745e-05	0.715714	0.712528	ZSCORE	no	4	5.898
0.00474981	0.638367	0.619968	DCS	yes	4	5.36167
0.00474981	0.638367	0.619968	MANORM	yes	4	5.36167
0.612604	0.524898	0.499074	ZSCORE	yes	5	5.31207
0.612604	0.524898	0.499074	ZSCORE	no	5	5.31207
0.279482	0.553061	0.548473	QUANTILE	yes	5	5.20164
0.249184	0.556531	0.543091	PARETO SCALING	yes	6	5.0073
0.249184	0.556531	0.543091	PARETO SCALING	no	6	5.0073
0.139567	0.572449	0.547264	PLUS(ABS(MIN))	yes	5	4.9829
0.139567	0.572449	0.547264	-	yes	5	4.9829
0.372462	0.543776	0.518656	QUANTILE T	yes	7	4.81993
0.0300659	0.606327	0.57566	ZSCORE	yes	6	4.74991
0.0300659	0.606327	0.57566	ZSCORE	no	6	4.74991
0.0633605	0.59102	0.574678	SQRT	yes	5	4.74676
0.211962	0.561224	0.537391	ZSCORE T	yes	8	4.73442
0.22762	0.559184	0.534235	QUANTILE	yes	6	4.64144
0.174926	0.566531	0.553398	LOG	yes	5	4.36269
0.583667	0.526939	0.486853	PLUS(ABS(MIN))	yes	6	4.3542
0.583667	0.526939	0.486853	-	yes	6	4.3542
0.461989	0.536122	0.53271	DRS	yes	4	4.11228
0.444421	0.537551	0.50658	DRS	yes	5	3.99146
0.194931	0.563571	0.529577	QUANTILE T	yes	8	3.82713
0.224424	0.559592	0.568917	ZSCORE T	yes	9	3.82628
0.78167	0.513673	0.516924	PLUS(ABS(MIN))	yes	7	3.55042
0.78167	0.513673	0.516924	-	yes	7	3.55042
0.0642525	0.590714	0.605876	QUANTILE T	yes	9	3.51314
0.285078	0.552449	0.512831	PARETO SCALING	yes	7	3.46882
0.285078	0.552449	0.512831	PARETO SCALING	no	7	3.46882
0.441943	0.537755	0.55309	LOG	yes	6	3.46076
0.522353	0.531429	0.535621	SQRT	yes	6	3.44629
0.958453	0.502653	0.481388	DCS	yes	5	3.33674
0.958453	0.502653	0.481388	MANORM	yes	5	3.33674
0.15227	0.570204	0.542943	DRS	yes	6	3.15379
0.955133	0.502857	0.497723	PARETO SCALING	no	8	3.08189
0.955133	0.502857	0.497723	PARETO SCALING	yes	8	3.08189
0.0942722	0.582041	0.570441	ZSCORE	yes	7	3.07918
0.0942722	0.582041	0.570441	ZSCORE	no	7	3.07918
0.369126	0.544082	0.528512	PLUS(ABS(MIN))	yes	8	2.9315
0.369126	0.544082	0.528512	-	yes	8	2.9315
0.558182	0.528776	0.517874	QUANTILE	yes	7	2.79548
0.318215	0.54898	0.525994	PARETO SCALING	no	9	2.69344
0.318215	0.54898	0.525994	PARETO SCALING	yes	9	2.69344
0.34095	0.546735	0.531939	QUANTILE	yes	8	2.6844
0.859413	0.508776	0.509326	ZSCORE	no	8	2.67893
0.859413	0.508776	0.509326	ZSCORE	yes	8	2.67893
0.00913885	0.627755	0.591988	SQRT	yes	7	2.63075
0.474771	0.535102	0.533462	DRS	yes	7	2.62875
0.563799	0.528367	0.532098	MANORM	yes	6	2.48962
0.563799	0.528367	0.532098	DCS	yes	6	2.48962
0.173605	0.566735	0.554018	DRS	yes	8	2.48651
0.985037	0.50102	0.510829	PLUS(ABS(MIN))	yes	9	2.47275
0.985037	0.50102	0.510829	-	yes	9	2.47275
0.222839	0.559796	0.548592	MANORM	no	2	2.39603
0.222839	0.559796	0.548592	DCS	no	2	2.39603
0.249184	0.556531	0.524398	PARETO SCALING	no	10	2.37529
0.249184	0.556531	0.524398	PARETO SCALING	yes	10	2.37529
0.0616012	0.591633	0.568841	LOG	yes	7	2.32539
0.538742	0.530204	0.509372	ZSCORE	yes	9	2.26813
0.538742	0.530204	0.509372	ZSCORE	no	9	2.26813
0.888965	0.506939	0.517011	QUANTILE	yes	9	2.26153
0.329449	0.547857	0.553859	QUANTILE T	yes	10	2.24429
0.544261	0.529796	0.526632	DCS	yes	7	2.21513
0.544261	0.529796	0.526632	MANORM	yes	7	2.21513
0.472199	0.535306	0.519961	QUANTILE	yes	10	2.12888
0.141814	0.572041	0.555751	PLUS(ABS(MIN))	yes	10	2.09277
0.141814	0.572041	0.555751	-	yes	10	2.09277
0.511572	0.532245	0.506176	ZSCORE	no	10	2.07259
0.511572	0.532245	0.506176	ZSCORE	yes	10	2.07259
0.153467	0.57	0.523313	QUANTILE	yes	11	2.01742
0.00208569	0.650816	0.639581	DCS	yes	8	2.01382
0.00208569	0.650816	0.639581	MANORM	yes	8	2.01382
0.277633	0.553265	0.570697	PARETO SCALING	yes	11	1.97164
0.277633	0.553265	0.570697	PARETO SCALING	no	11	1.97164
0.444421	0.537551	0.526425	ZSCORE	yes	11	1.95476
0.444421	0.537551	0.526425	ZSCORE	no	11	1.95476
0.343067	0.546531	0.570228	PLUS(ABS(MIN))	yes	11	1.86836
0.343067	0.546531	0.570228	-	yes	11	1.86836
0.158326	0.569184	0.554637	DRS	yes	9	1.82795
0.000160821	0.684898	0.63474	MANORM	no	3	1.78931
0.000160821	0.684898	0.63474	DCS	no	3	1.78931
0.158326	0.569184	0.564684	ZSCORE	yes	12	1.70718
0.158326	0.569184	0.564684	ZSCORE	no	12	1.70718
0.28696	0.552245	0.573536	QUANTILE	yes	12	1.58743
0.184386	0.565102	0.517904	SQRT	yes	8	1.54737
0.184386	0.565102	0.576816	DRS	yes	10	1.54589
0.47735	0.534898	0.517369	DCS	yes	9	1.51159
0.47735	0.534898	0.517369	MANORM	yes	9	1.51159
0.256098	0.555714	0.55655	LOG	yes	8	1.44313
0.298429	0.55102	0.551179	QUANTILE	yes	13	1.26645
0.373586	0.543673	0.543002	ZSCORE	yes	13	1.19054
0.373586	0.543673	0.543002	ZSCORE	no	13	1.19054
0.00400576	0.64102	0.599557	SQRT	yes	9	1.18378
0.405731	0.540816	0.551868	LOG	yes	9	1.16022
0.0117589	0.623469	0.608003	LOG	no	2	1.12636
0.0333748	0.604286	0.571679	DCS	yes	10	1.08246
0.0333748	0.604286	0.571679	MANORM	yes	10	1.08246
0.295527	0.551327	0.567433	QUANTILE T	yes	11	1.03599
0.503562	0.532857	0.530481	MANORM	no	4	0.99826
0.503562	0.532857	0.530481	DCS	no	4	0.99826
0.589404	0.526531	0.505094	SQRT	yes	10	0.920461
0.538742	0.530204	0.507917	PARETO SCALING	no	12	0.896995
0.538742	0.530204	0.507917	PARETO SCALING	yes	12	0.896995
0.968418	0.502041	0.477464	ZSCORE T	yes	10	0.796058
0.100154	0.580612	0.565023	QUANTILE	yes	14	0.734759
0.0303836	0.606122	0.595331	SQRT	no	2	0.704946
0.732543	0.516837	0.502333	QUANTILE T	yes	12	0.686831
0.149897	0.570612	0.550586	ZSCORE	no	14	0.681669
0.149897	0.570612	0.550586	ZSCORE	yes	14	0.681669
0.00039333	0.673673	0.674357	SQRT	yes	11	0.636575
0.00365052	0.642449	0.616373	MANORM	no	5	0.590758
0.00365052	0.642449	0.616373	DCS	no	5	0.590758
0.237402	0.557959	0.561381	PARETO SCALING	no	13	0.578122
0.237402	0.557959	0.561381	PARETO SCALING	yes	13	0.578122
0.118581	0.576531	0.586098	ZSCORE T	yes	11	0.511364
0.810613	0.511837	0.486484	DCS	no	6	0.401622
0.810613	0.511837	0.486484	MANORM	no	6	0.401622
0.000183731	0.683265	0.697657	SQRT	yes	12	0.396282
0.0761788	0.586939	0.570855	LOG	yes	10	0.39337
0.737256	0.516531	0.508406	LOG	no	3	0.375847
0.49562	0.533469	0.507578	PLUS(ABS(MIN))	yes	12	0.368736
0.49562	0.533469	0.507578	-	yes	12	0.368736
0.975065	0.501633	0.480023	DRS	yes	11	0.324872
0.172291	0.566939	0.542713	PARETO SCALING	no	14	0.317503
0.172291	0.566939	0.542713	PARETO SCALING	yes	14	0.317503
0.378079	0.543265	0.489733	SQRT	yes	13	0.303408
0.630265	0.523673	0.528441	MANORM	no	7	0.300844
0.630265	0.523673	0.528441	DCS	no	7	0.300844
0.472199	0.535306	0.531355	MANORM	no	8	0.26814
0.472199	0.535306	0.531355	DCS	no	8	0.26814
0.23906	0.557755	0.535765	ZSCORE T	yes	12	0.268138
0.000608432	0.667959	0.658757	LOG	no	4	0.266787
0.847969	0.50949	0.524589	QUANTILE T	yes	13	0.243211
0.205922	0.562041	0.567368	PLUS(ABS(MIN))	yes	13	0.241908
0.205922	0.562041	0.567368	-	yes	13	0.241908
0.0024639	0.648367	0.632099	MANORM	no	9	0.241698
0.0024639	0.648367	0.632099	DCS	no	9	0.241698
0.358122	0.545102	0.533049	QUANTILE	no	2	0.235387
0.516948	0.531837	0.557342	LOG	no	5	0.218039
0.106325	0.579184	0.589168	DRS	yes	12	0.208005
0.0549633	0.594082	0.551372	SQRT	yes	14	0.203478
0.027043	0.608367	0.535341	DCS	yes	11	0.198068
0.027043	0.608367	0.535341	MANORM	yes	11	0.198068
0.49826	0.533265	0.518715	DCS	no	10	0.182189
0.49826	0.533265	0.518715	MANORM	no	10	0.182189
0.669251	0.52102	0.51853	SQRT	no	3	0.172896
0.0164652	0.617551	0.602077	DRS	no	2	0.162323
0.0155515	0.618571	0.599893	PLUS(ABS(MIN))	no	2	0.153297
0.0155515	0.618571	0.599893	-	no	2	0.153297
0.00138091	0.656735	0.648144	SQRT	no	4	0.141472
0.0316833	0.605306	0.572819	MANORM	no	11	0.131028
0.0316833	0.605306	0.572819	DCS	no	11	0.131028
0.184386	0.565102	0.537437	PLUS(ABS(MIN))	yes	14	0.126948
0.184386	0.565102	0.537437	-	yes	14	0.126948
0.000812082	0.664082	0.577256	LOG	yes	11	0.12316
0.205922	0.562041	0.550161	LOG	no	6	0.119705
0.312191	0.549592	0.566326	SQRT	no	5	0.10958
0.213492	0.56102	0.535622	DRS	yes	13	0.102191
0.0695274	0.58898	0.558077	QUANTILE	no	3	0.102075
0.451903	0.536939	0.549942	LOG	no	7	0.0956296
3.76555e-06	0.726531	0.677587	ZSCORE T	no	2	0.0947008
0.0043921	0.639592	0.639218	DCS	yes	12	0.0855456
0.0043921	0.639592	0.639218	MANORM	yes	12	0.0855456
0.0942722	0.582041	0.573373	SQRT	no	6	0.0683289
0.0347831	0.603469	0.567853	ZSCORE T	no	3	0.0679484
0.0657708	0.590204	0.567595	LOG	no	8	0.0642427
0.218129	0.560408	0.542072	ZSCORE T	yes	13	0.0615684
3.05761e-07	0.750816	0.736153	QUANTILE	no	4	0.0569295
0.000741789	0.665306	0.672517	LOG	yes	12	0.0548167
0.00107753	0.660204	0.670856	DCS	yes	13	0.0536635
0.00107753	0.660204	0.670856	MANORM	yes	13	0.0536635
0.000666937	0.666735	0.669519	ZSCORE T	no	4	0.052964
0.000114746	0.68898	0.688483	PLUS(ABS(MIN))	no	3	0.0508276
0.000114746	0.68898	0.688483	-	no	3	0.0508276
0.21503	0.560816	0.54649	QUANTILE	no	5	0.0505662
0.490362	0.533878	0.537469	SQRT	no	7	0.0503269
0.000166282	0.68449	0.690326	DRS	no	3	0.0501859
4.28851e-06	0.725204	0.674294	QUANTILE T	no	2	0.044451
0.174926	0.566531	0.548354	QUANTILE	no	6	0.0442898
0.240727	0.557551	0.557783	LOG	no	9	0.0398045
0.0484563	0.596735	0.5773	SQRT	no	8	0.0374127
0.174926	0.566531	0.55215	ZSCORE T	no	5	0.0356581
0.00100082	0.661224	0.673392	LOG	yes	13	0.0338756
0.177591	0.566122	0.529491	DCS	yes	14	0.0332274
0.177591	0.566122	0.529491	MANORM	yes	14	0.0332274
0.000418951	0.672857	0.658671	PLUS(ABS(MIN))	no	4	0.0332027
0.000418951	0.672857	0.658671	-	no	4	0.0332027
0.00021669	0.681224	0.681421	DRS	no	4	0.0327309
0.25522	0.555816	0.511821	QUANTILE T	no	3	0.0320553
0.472199	0.535306	0.545183	LOG	no	10	0.0319847
0.263143	0.554898	0.497655	ZSCORE T	no	6	0.0284461
0.049652	0.596224	0.582328	QUANTILE T	no	4	0.0279265
0.141814	0.572041	0.559749	QUANTILE	no	7	0.0266278
0.158326	0.569184	0.546293	QUANTILE	no	8	0.026452
0.525067	0.531224	0.547871	ZSCORE T	no	7	0.0254875
0.595166	0.526122	0.531865	ZSCORE T	no	8	0.022605
0.1246	0.575306	0.549765	PLUS(ABS(MIN))	no	5	0.0225543
0.1246	0.575306	0.549765	-	no	5	0.0225543
0.277633	0.553265	0.536384	DRS	no	5	0.022368
0.885673	0.507143	0.516206	QUANTILE	no	9	0.021431
0.107231	0.57898	0.532995	QUANTILE	no	10	0.0204257
0.514256	0.532041	0.500646	DRS	no	6	0.0201493
0.20742	0.561837	0.537284	QUANTILE	no	11	0.0201464
0.136249	0.573061	0.529637	LOG	yes	14	0.0199005
0.743551	0.516122	0.477502	PLUS(ABS(MIN))	no	6	0.0197453
0.743551	0.516122	0.477502	-	no	6	0.0197453
0.347327	0.546122	0.533171	SQRT	no	9	0.018648
0.673806	0.520714	0.53601	QUANTILE T	no	5	0.0178033
0.181645	0.56551	0.533793	PLUS(ABS(MIN))	no	7	0.0177003
0.181645	0.56551	0.533793	-	no	7	0.0177003
0.211962	0.561224	0.537404	ZSCORE T	no	9	0.0172789
0.162047	0.568571	0.539685	DRS	no	7	0.017196
0.279482	0.553061	0.574471	QUANTILE	no	12	0.015043
0.245777	0.556939	0.577674	SQRT	no	10	0.014441
0.432109	0.538571	0.540029	DRS	no	8	0.0143205
0.226018	0.559388	0.568508	ZSCORE T	no	10	0.0139686
0.589404	0.526531	0.532568	PLUS(ABS(MIN))	no	8	0.0139071
0.589404	0.526531	0.532568	-	no	8	0.0139071
0.15108	0.570408	0.549352	DRS	no	9	0.0130256
0.137348	0.572857	0.546902	PLUS(ABS(MIN))	no	9	0.0128625
0.137348	0.572857	0.546902	-	no	9	0.0128625
0.19637	0.563367	0.55122	QUANTILE T	no	6	0.0121929
0.275793	0.553469	0.556035	QUANTILE	no	13	0.0120195
0.0840854	0.584694	0.566867	LOG	no	11	0.0108727
0.0283673	0.607449	0.577014	QUANTILE T	no	7	0.0106408
0.00723132	0.631633	0.625573	DCS	no	12	0.0104549
0.00723132	0.631633	0.625573	MANORM	no	12	0.0104549
0.148721	0.570816	0.562892	DRS	no	10	0.00967611
0.154671	0.569796	0.55581	PLUS(ABS(MIN))	no	10	0.0094728
0.154671	0.569796	0.55581	-	no	10	0.0094728
0.00115966	0.659184	0.657747	SQRT	no	11	0.00935673
0.355946	0.545306	0.569126	PLUS(ABS(MIN))	no	11	0.00845487
0.355946	0.545306	0.569126	-	no	11	0.00845487
0.20742	0.561837	0.577771	DRS	no	11	0.00842201
0.372462	0.543776	0.518712	QUANTILE T	no	8	0.00837035
0.106325	0.579184	0.563446	QUANTILE	no	14	0.00696291
0.192075	0.56398	0.529964	QUANTILE T	no	9	0.0066373
0.00168795	0.653878	0.667117	DCS	no	13	0.00651579
0.00168795	0.653878	0.667117	MANORM	no	13	0.00651579
0.0654622	0.590306	0.605418	QUANTILE T	no	10	0.00610099
7.99312e-05	0.693265	0.702468	SQRT	no	12	0.00580361
0.797715	0.512653	0.482791	MANORM	no	14	0.00455611
0.797715	0.512653	0.482791	DCS	no	14	0.00455611
0.451903	0.536939	0.493354	SQRT	no	13	0.00455499
0.331521	0.547653	0.5537	QUANTILE T	no	11	0.00389777
0.378079	0.543265	0.512977	SQRT	no	14	0.00319062
0.975065	0.501633	0.478486	ZSCORE T	no	11	0.00290363
0.119568	0.576327	0.586116	ZSCORE T	no	12	0.00186681
0.295527	0.551327	0.567433	QUANTILE T	no	12	0.00179898
0.978389	0.501429	0.479918	DRS	no	12	0.00177135
0.971741	0.501837	0.478857	PLUS(ABS(MIN))	no	12	0.00171518
0.971741	0.501837	0.478857	-	no	12	0.00171518
0.00097157	0.661633	0.668937	LOG	no	12	0.00151566
0.738825	0.516429	0.502083	QUANTILE T	no	13	0.00119282
0.105425	0.579388	0.589216	DRS	no	13	0.00113445
0.0775694	0.586531	0.589666	PLUS(ABS(MIN))	no	13	0.00111443
0.0775694	0.586531	0.589666	-	no	13	0.00111443
0.237402	0.557959	0.535994	ZSCORE T	no	13	0.000978136
0.00104621	0.660612	0.673104	LOG	no	13	0.000936448
0.788077	0.513265	0.484397	LOG	no	14	0.000620225
0.194219	0.563673	0.537027	PLUS(ABS(MIN))	no	14	0.000574564
0.194219	0.563673	0.537027	-	no	14	0.000574564
0.21503	0.560816	0.535695	DRS	no	14	0.000557256
0.847969	0.50949	0.524526	QUANTILE T	no	14	0.000417249
0.707594	0.518469	0.516446	ZSCORE T	yes	14	4.89199e-29
0.0734392	0.587755	0.630496	DRS	yes	14	1.35906e-29
0.603492	0.52551	0.490694	QUANTILE T	yes	14	2.04973e-30
0.893459	0.506633	0.534966	ZSCORE T	no	14	1.07665e-30
